# Supplementary material for: Design of multifunctional phytate coated magnetic composites for combined therapy with antitumor drugs
Source: Royal Society of Chemistry journal article supplement (doi:10.1039/c7nj03258g), 2017-01-01
Supplement: c7nj03258g1.pdf [file c7nj03258g1.pdf]

## Design of multifunctional phytate coated magnetic composites for combined therapy with antitumor drugs

Xuejie Guo<sup>a,b</sup>, Rumin Li<sup>a,b,c,\*</sup>, Jingyuan Liu<sup>a,b</sup>, Rongrong Chen<sup>b,c</sup>, Hongsen Zhang<sup>a,b</sup>, Qi Liu<sup>a,b,\*</sup>, Zhanshuang Li<sup>a,b</sup> and Jun Wang<sup>a,c</sup>

<sup>a</sup>Key Laboratory of Superlight Material and Surface Technology, Ministry of Education, Harbin Engineering University, Harbin 150001, China.

<sup>b</sup>College of Materials Science and Chemical Engineering, Harbin Engineering University, 150001, P. R. China.

<sup>c</sup>Institute of Advanced Marine Materials, Harbin Engineering University, 150001, P. R. China.

E-mail: [lrn1888@hotmail.com](mailto:lrn1888@hotmail.com); [qiliu@hrbeu.edu.cn](mailto:qiliu@hrbeu.edu.cn);

### SUPPORTING INFORMATION

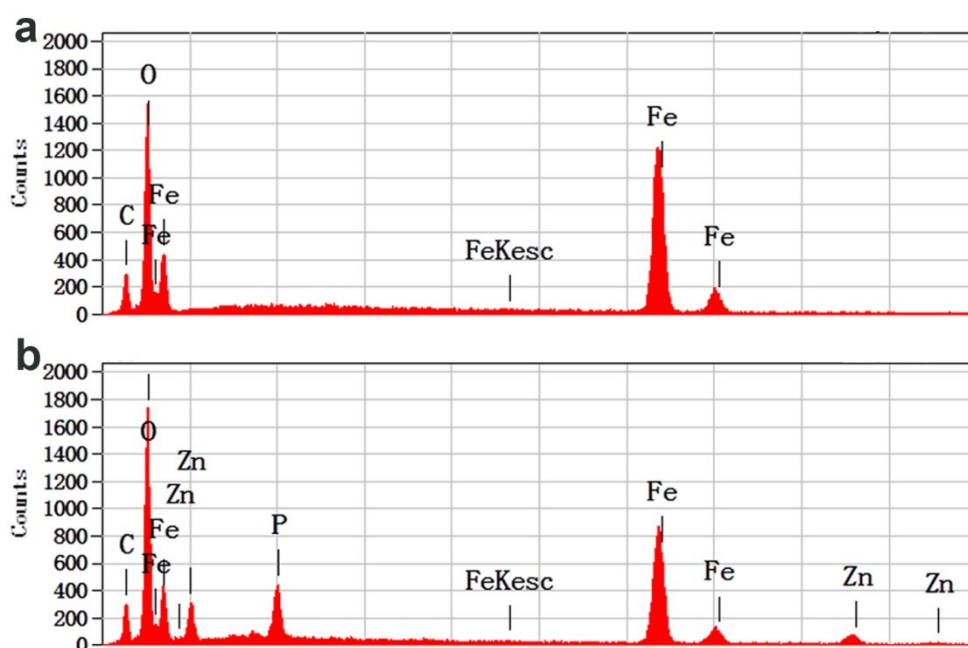

Figure S1. EDS spectra of naked Fe<sub>3</sub>O<sub>4</sub>-CMC(a) and Fe<sub>3</sub>O<sub>4</sub>-CMC@Zn-PA nanocarriers(b).

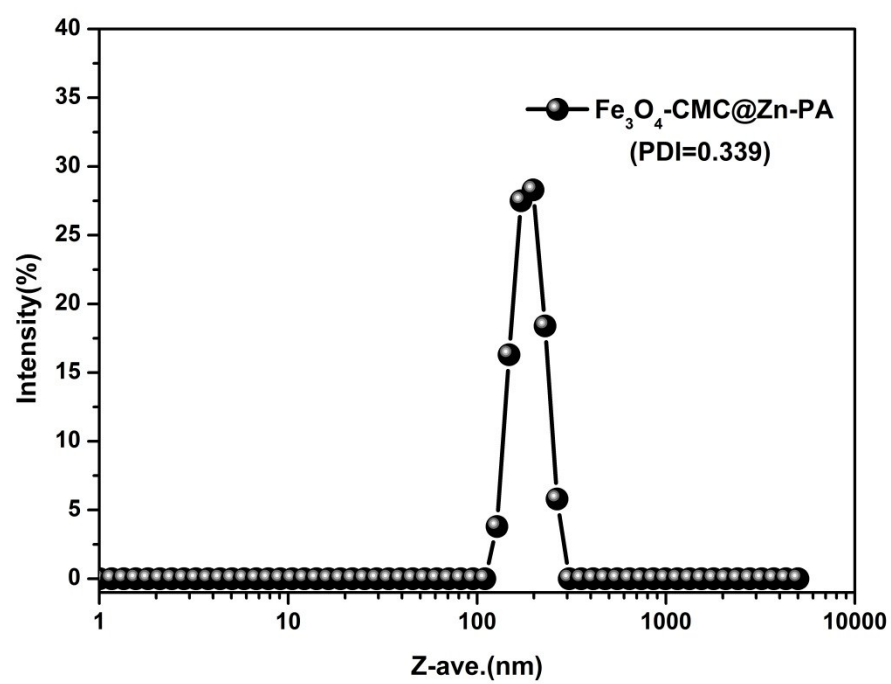

Figure S2. Particle size distribution of  $\text{Fe}_3\text{O}_4\text{-CMC@Zn-PA}$  nanocarriers.

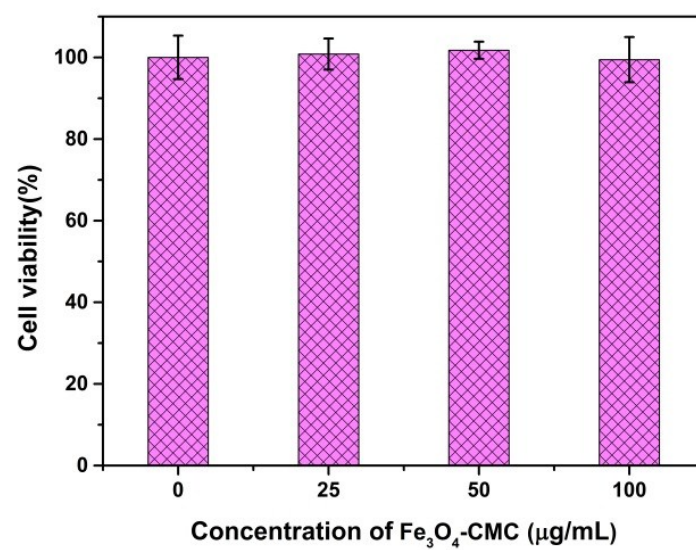

**Figure S3** Cell viabilities of Fe<sub>3</sub>O<sub>4</sub>-CMC with the different concentrations to MG63 cells
